# Supplementary material
Source: MDPI journal article supplement (https://www.mdpi.com/2306-5729/4/2/64)
Supplement: s1 [file s1]

Supplementary Figures

Adhikari et al., Lateral root and nodule transcriptomes of soybean

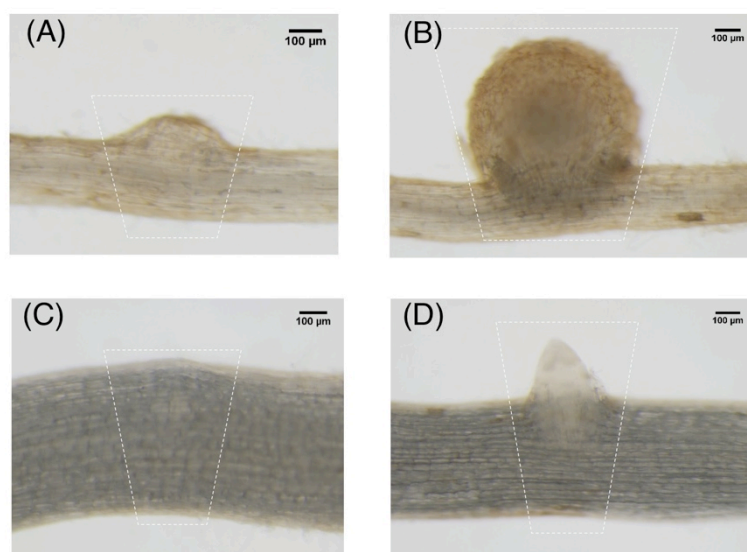

**Figure S1.** Representative images of root lateral organs and corresponding control tissues harvested for transcriptome library construction. The portions shown enclosed in white dotted lines are (A) emerging nodules, (B) mature nodules, (C) emerging lateral roots, and (D) young lateral roots. Adjacent root tissues outside the dotted line boxes served as controls for the respective organs.

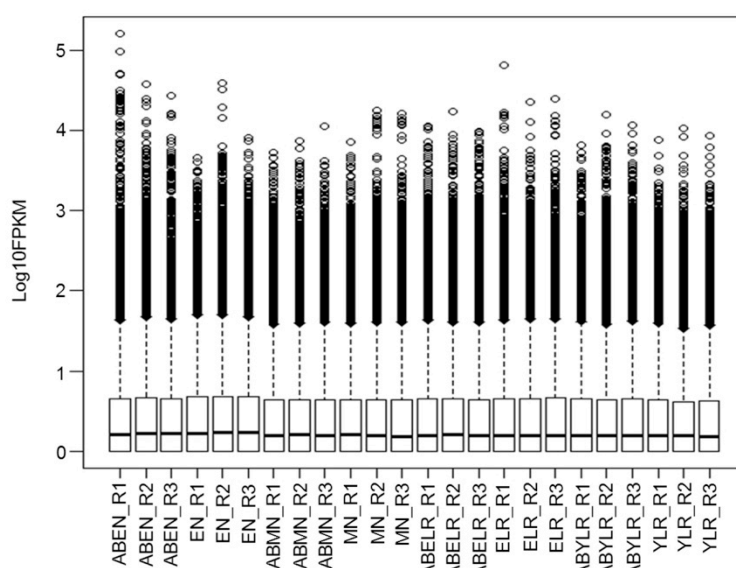

**Figure S2.** Box plots showing that the distribution of FPKM values (log transformed) was similar among all 24 libraries. This suggested that any differences observed between these libraries are not due to overall differences in distribution of FPKM values.

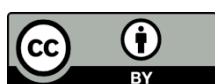

© 2019 by the authors. Submitted for possible open access publication under the terms and conditions of the Creative Commons Attribution (CC BY) license (<http://creativecommons.org/licenses/by/4.0/>).
